# Supplementary material for: The unmet needs of informal carers of stroke survivors: a protocol for a systematic review of quantitative and qualitative studies
Source: PubMed Central journal article supplement — BMJ Open. 2018 Jan 31;8(1):e019571. doi: 10.1136/bmjopen-2017-019571 (PMC5878248; doi:10.1136/bmjopen-2017-019571), 2018-01-31
Supplement: bmjopen-2017-019571.draft_revisions.pdf [file bmjopen-2017-019571.draft_revisions.pdf]

# BMJ Open

BMJ Open is committed to open peer review. As part of this commitment we make the peer review history of every article we publish publicly available.

When an article is published we post the peer reviewers' comments and the authors' responses online. We also post the versions of the paper that were used during peer review. These are the versions that the peer review comments apply to.

The versions of the paper that follow are the versions that were submitted during the peer review process. They are not the versions of record or the final published versions. They should not be cited or distributed as the published version of this manuscript.

BMJ Open is an open access journal and the full, final, typeset and author-corrected version of record of the manuscript is available on our site with no access controls, subscription charges or pay-per-view fees (<http://bmjopen.bmj.com>).

If you have any questions on BMJ Open's open peer review process please email [editorial.bmjopen@bmj.com](mailto:editorial.bmjopen@bmj.com)

# BMJ Open

## A protocol for a systematic review of quantitative and qualitative studies of the unmet needs of informal carers of stroke survivors

|                                 |                                                                                                                                                                                                                                                                                                                                                                                                                                                                                                                                                                                             |
|---------------------------------|---------------------------------------------------------------------------------------------------------------------------------------------------------------------------------------------------------------------------------------------------------------------------------------------------------------------------------------------------------------------------------------------------------------------------------------------------------------------------------------------------------------------------------------------------------------------------------------------|
| Journal:                        | <i>BMJ Open</i>                                                                                                                                                                                                                                                                                                                                                                                                                                                                                                                                                                             |
| Manuscript ID                   | bmjopen-2017-019571                                                                                                                                                                                                                                                                                                                                                                                                                                                                                                                                                                         |
| Article Type:                   | Protocol                                                                                                                                                                                                                                                                                                                                                                                                                                                                                                                                                                                    |
| Date Submitted by the Author:   | 14-Sep-2017                                                                                                                                                                                                                                                                                                                                                                                                                                                                                                                                                                                 |
| Complete List of Authors:       | Denham, Alexandra; University of Newcastle, School of Medicine and Public Health<br>Baker, Amanda; University of Newcastle,<br>Spratt, Neil; University of Newcastle, School of Biomedical Sciences and Pharmacy<br>Guillaumier, Ashleigh; University of Newcastle, School of Medicine & Public Health<br>Wynne, Olivia; University of Newcastle<br>Turner, Alyna; University of Newcastle, School of Medicine and Public Health<br>Magin, Parker; University of Newcastle, Discipline of General Practice<br>Bonevski, Billie; University of Newcastle, School of Medicine & Public Health |
| <b>Primary Subject Heading</b>: | Public health                                                                                                                                                                                                                                                                                                                                                                                                                                                                                                                                                                               |
| Secondary Subject Heading:      | Public health                                                                                                                                                                                                                                                                                                                                                                                                                                                                                                                                                                               |
| Keywords:                       | Stroke < NEUROLOGY, Carers, QUALITATIVE RESEARCH, Quantitative research, Systematic review                                                                                                                                                                                                                                                                                                                                                                                                                                                                                                  |
|                                 |                                                                                                                                                                                                                                                                                                                                                                                                                                                                                                                                                                                             |

SCHOLARONE™  
Manuscripts

1  
2  
3 **A protocol for a systematic review of quantitative and qualitative studies of the unmet**  
4  
5 **needs of informal carers of stroke survivors**  
6  
7

8 Authors: Alexandra M.J. Denham<sup>1</sup>; Amanda L. Baker<sup>1</sup>; Neil J. Spratt<sup>2</sup>; Ashleigh  
9  
10 Guillaumier<sup>1</sup>; Olivia Wynne<sup>1</sup>; Alyna Turner<sup>1</sup>; Parker Magin<sup>1</sup>; Billie Bonevski<sup>1</sup>  
11

12  
13 <sup>1</sup>School of Medicine and Public Health, Faculty of Health and Medicine, University of  
14  
15 Newcastle & Hunter Medical Research Institute, Callaghan, NSW 2308, Australia.  
16

17  
18 <sup>2</sup> School of Biomedical Sciences and Pharmacy, University of Newcastle, University Drive,  
19  
20 Callaghan, NSW 2308, Australia.  
21

22  
23  
24  
25  
26 Corresponding Author Name: Alexandra M.J. Denham  
27

28  
29 Institutional affiliation: School of Medicine and Public Health, Faculty of Health and  
30  
31 Medicine, University of Newcastle & Hunter Medical Research Institute, Callaghan, NSW  
32  
33 2308, Australia.  
34

35  
36 E-mail address: Alexandra.Denham@newcastle.edu.au  
37

38  
39 Mail address: Level 5 McAuley Building Calvary Mater Hospital  
40  
41 Waratah, NSW, 2298,  
42  
43 Australia  
44

45  
46  
47 Name: Amanda L. Baker  
48

49  
50 Institutional affiliation: School of Medicine and Public Health, Faculty of Health and  
51  
52 Medicine, University of Newcastle & Hunter Medical Research Institute, Callaghan, NSW  
53  
54 2308, Australia.  
55

56  
57 E-mail address: Amanda.Baker@newcastle.edu.au  
58  
59  
60

1  
2  
3 Name: Neil J. Spratt  
4

5  
6 Institutional affiliation: School of Biomedical Sciences and Pharmacy, University of  
7  
8 Newcastle, University Drive, Callaghan, NSW 2308, Australia.  
9

10  
11 E-mail address: Neil.Spratt@newcastle.edu.au  
12

13  
14  
15  
16  
17 Name: Ashleigh Guillaumier  
18

19  
20 Institutional affiliation: School of Medicine and Public Health, Faculty of Health and  
21  
22 Medicine, University of Newcastle & Hunter Medical Research Institute, Callaghan, NSW  
23  
24 2308, Australia.  
25

26  
27 E-mail address: Ashleigh.Guillaumier@newcastle.edu.au  
28

29  
30  
31  
32 Name: Olivia Wynne  
33

34  
35 Institutional affiliation: School of Medicine and Public Health, Faculty of Health and  
36  
37 Medicine, University of Newcastle & Hunter Medical Research Institute, Callaghan, NSW  
38  
39 2308, Australia.  
40

41  
42  
43 E-mail address: Olivia.Wynne@newcastle.edu.au  
44

45  
46  
47  
48 Name: Alyna Turner  
49

50  
51 Institutional affiliation: School of Medicine and Public Health, Faculty of Health and  
52  
53 Medicine, University of Newcastle & Hunter Medical Research Institute, Callaghan, NSW  
54  
55 2308, Australia.  
56

57  
58 E-mail address: Alyna.Turner@newcastle.edu.au  
59  
60

1  
2  
3 Name: Parker Magin  
4

5  
6 Institutional affiliation: School of Medicine and Public Health, Faculty of Health and  
7  
8 Medicine, University of Newcastle & Hunter Medical Research Institute, Callaghan, NSW  
9  
10 2308, Australia.  
11

12  
13 E-mail address: Parker.Magin@newcastle.edu.au  
14  
15

16  
17  
18  
19 Name: Billie Bonevski  
20

21  
22 Institutional affiliation: School of Medicine and Public Health, Faculty of Health and  
23  
24 Medicine, University of Newcastle & Hunter Medical Research Institute, Callaghan, NSW  
25  
26 2308, Australia.  
27

28  
29 E-mail address: Billie.Bonevski@newcastle.edu.au  
30  
31  
32  
33  
34  
35  
36  
37  
38  
39  
40  
41  
42  
43  
44  
45  
46  
47  
48  
49  
50  
51  
52  
53  
54  
55  
56  
57  
58  
59  
60

## Abstract

**Introduction:** Stroke events deeply affect not only the stroke survivor but also the quality of life, and physical and psychological health of the family and friends who care for them. There is a need for further information about the unmet needs of these informal carers in order to develop support services and interventions. The primary objective of this review is to report and synthesise the research describing the unmet needs of carers of stroke survivors.

**Methods and Analysis:** A systematic review of quantitative and qualitative studies that report on the unmet needs of carers will be conducted. The following databases will be searched for relevant articles: MEDLINE, Cumulative Index to Nursing and Allied Health Literature (CINAHL), PsycINFO, Embase, Allied and Complementary Medicine Database (AMED), and Scopus. No publication date constraints will be applied. Studies will be limited to those published in English and conducted among humans. Eligible studies will report on the unmet needs of informal carers of stroke survivors, defined as family members, friends and other unpaid caregivers. Studies which focus on formal, clinical or medical caregivers will be excluded. A narrative synthesis of the main outcomes will be reported.

**Ethics and Dissemination:** This review will be submitted to a peer-reviewed journal. Our findings are expected to provide new insights into the unmet needs of stroke survivors' carers. Knowledge about the unmet needs of carers will inform the development and refinement of interventions and services to address these needs and better support carers of stroke survivors. The findings of this systematic review will be disseminated publicly and in peer-reviewed journals, and may be the topic of research presentations.

**Trial registration number:** CRD42017067391.

## Strengths and limitations of this study

### Strengths

- The inclusion of both qualitative and quantitative studies will provide more informative findings on the unmet needs of carers of stroke survivors.
- Our chosen method of analysing and synthesising qualitative and quantitative data has been tested and found effective for systematic reviews<sup>1</sup>.
- The quality of the review will be strengthened by the input and involvement of multiple reviewers at each stage of the review

### Limitations

- As there are few valid and reliable measures for assessing methodological rigor of qualitative research<sup>2</sup> and mixed-method assessment<sup>3</sup> there is a risk that flawed studies may bias the results of the systematic review.
- It is also possible that there are relevant non-English studies that will not be included in this review, therefore these findings may not be generalizable to non-English speaking populations in which there may be differing cultural unmet needs of carers of stroke survivors

## INTRODUCTION

### Rationale

As stroke survivors are often cognitively or physically disabled post-stroke, many require a carer to support them once discharged from acute care. Approximately 50% of people who have a stroke will require support from a carer<sup>4</sup>, and the three most common areas that stroke survivors report needing assistance in are cognitive or emotional tasks, mobility and health care<sup>5</sup>. The Australian Survey of Disability, Ageing and Carers identified that 2.86 million Australians are informal carers, and 26,367 of these people have taken on the role of caregiver for someone with stroke as their main condition<sup>6</sup>. In England and Wales, it is estimated that 10% of the population are carers, with 60% of people becoming carers at some point<sup>7,8</sup>. In the United States, it is estimated that 4.35 million people are informal carers<sup>9</sup>, and of those, 2.2 million are people who care for someone who has had a stroke<sup>10,11</sup>. These numbers are expected to increase with demographic changes worldwide<sup>6,8,10</sup>, therefore it is becoming increasingly important to recognise the ongoing support needs of carers of stroke survivors.

There are a number of definitions of “carers” across stroke studies<sup>12,13</sup>, generally they are referred to as informal, unpaid or primary carers, or as caregivers. Carers of stroke survivors may be family members, friends or other close individuals who provide physical or emotional support<sup>13</sup>. Informal carers (defined as people who provide unpaid care, support and/or assistance to someone in need of care) of stroke survivors are predominantly female spouses of the stroke survivor<sup>14</sup>, and often take on a variety of complex tasks and roles, including physical, psychological, and daily living support with varying time commitments. The average time spent caring for someone with stroke has been reported to be 41 hours per week<sup>6</sup>. Furthermore, the replacement financial value of informal care across countries is



1  
2  
3 staggering. If all hours of informal care were replaced with services purchased from formal  
4 care providers, the value would be \$60.3 billion in Australia<sup>6</sup>, £119 billion pounds in the  
5 United Kingdom<sup>7</sup> and \$470 billion in the United States<sup>15</sup>.  
6  
7  
8

9  
10 Caring for someone who has had a stroke can lead to issues and concerns for the carer,  
11 and these issues can also change over time<sup>16</sup>. For example, when carers must put aside their  
12 own needs to care for the stroke survivor, they can experience a sense of loss of autonomy<sup>17</sup>.  
13 Carers often report feeling underprepared to provide practical support following the patient's  
14 discharge from hospital, and also report feeling excluded from discharge and follow-up plans  
15 with health providers<sup>17-19</sup>. As a result, carers commonly experience a decline in their own  
16 physical and mental health, and a reduced quality of life<sup>20-22</sup>. As psychological distress is  
17 becoming increasingly common and health outcomes are declining in informal carers<sup>23</sup>, there  
18 is a need to gain further understanding of the underlying mechanisms behind the unique  
19 unmet needs of informal carers of stroke survivors.  
20  
21  
22  
23  
24  
25  
26  
27  
28  
29  
30  
31  
32

33 Unmet needs refer to a need that has not been satisfied yet. Carer needs often relate to  
34 inadequate information and resources, such as receiving information on stroke management  
35 and recovery, and/or how to contact a health care professional who could offer them  
36 psychological or emotional support<sup>24 25</sup>. Research suggests unmet needs result in adverse  
37 outcomes, such as increased burden, and depression and anxiety, for carers of those with  
38 disabilities and chronic illness<sup>22 25-27</sup>. Greenwood et al.<sup>14</sup> systematically reviewed qualitative  
39 studies investigating the challenges, satisfactions and coping strategies of carers of stroke  
40 survivors. The studies in the review described difficulties such as uncertainty,  
41 informational/training needs, and role and relationship changes of carers of stroke survivors.  
42 Unmet needs are an extremely important area of research, and it is becoming increasingly  
43 important to address these unmet needs to ensure the health and wellbeing of carers, and the  
44 people that they care for.  
45  
46  
47  
48  
49  
50  
51  
52  
53  
54  
55  
56  
57  
58  
59  
60

1  
2  
3 While there are interventions designed to address the unmet needs of carers of stroke  
4 survivors, research suggests the interventions require further evaluation, development and  
5 refinement to target these outcomes. A systematic review conducted by Eldred<sup>28</sup> investigating  
6 psychosocial interventions for carers of survivors of stroke found that interventions are  
7 failing to address carer depression, loneliness and stress, while there has been some success  
8 with interventions that use counselling and education to promote coping and adjustment to  
9 the carer role. In these studies, unmet psychological needs (such as depression) were directly  
10 reported by carers using validated measures of psychological health outcomes. These findings  
11 highlight the need to develop effective psychological interventions targeting the psychosocial  
12 functioning of carers of stroke survivors. A systematic review by Aldehaim et al.<sup>29</sup> focused  
13 on technology-based interventions for carers of stroke survivors. Only one study of the five  
14 studies eligible for review assessed carer preparedness for the caring role, a known unmet  
15 need identified by carers of stroke survivors<sup>30-33</sup>. That review emphasized the need for  
16 interventions to be provided to carers of stroke survivors as soon as possible as a strategy to  
17 address unmet needs. The limitations of interventions for carers of stroke survivors include:  
18 (1) not being delivered to carers after the stroke survivor is discharged home; (2) not  
19 providing appropriate interventions to the changing needs of carers through the stroke  
20 survivors' transition from home, to hospital and eventually the community; and (3) not  
21 targeting appropriate unmet needs outcomes for informal carers, including preparedness and  
22 psychosocial functioning, and unique unmet needs for carers of stroke survivors such as  
23 support with possible communication and mobility issues.

24  
25  
26  
27  
28  
29  
30  
31  
32  
33  
34  
35  
36  
37  
38  
39  
40  
41  
42  
43  
44  
45  
46  
47  
48  
49  
50  
51 There are currently no systematic reviews examining the unmet needs of carers of  
52 stroke survivors in both qualitative and quantitative studies. Thus, this review aims to:

- 53  
54  
55 1) Define and identify the unmet needs of carers of stroke survivors
- 56  
57 2) Define the variables associated with unmet needs of carers of stroke survivors

- 3) Report the prevalence of unmet needs identified in quantitative studies
- 4) Thematically analyse qualitative data to report meaningful patterns and themes of unmet needs of carers of stroke survivors
- 5) Synthesise quantitative and qualitative research on the unmet needs of carers of stroke survivors to guide the development of interventions and services to support carers of stroke survivors.

## METHODS AND ANALYSES

### Study Design

We will conduct a systematic review of studies reporting on unmet needs of informal carers of stroke survivors. These studies will be published in English and have no publication year limit. Qualitative and quantitative studies will be included and synthesised in this review.

This systematic review protocol will conform with the Preferred Reporting Items for Systematic Review and Meta-Analysis Protocols (PRISMA-P)<sup>34 35</sup> and will be reported in accordance with the (PRISMA) statement<sup>36 37</sup>.

### Study Registration

Based on the PRISMA-P guidelines<sup>34</sup>, this systematic review has been registered with the International Prospective Register of Systematic Reviews (PROSPERO) in July 2017:

CRD42017067391.

### Eligibility criteria

#### Types of studies

To be eligible for this systematic review, manuscripts must be published in a peer-reviewed journal and report primary data on the unmet needs self-reported by carers of stroke survivors. The needs of carers reported by others (such as the stroke survivors or by health

professionals) will be excluded. English language qualitative, quantitative and mixed methods studies will be included. Intervention studies will be included if they report the baseline estimates of carers' unmet needs.

### **Participants**

Carers of stroke survivors are defined as the spouse or partner, family members, friends or 'significant others' who provide unpaid physical, practical or emotional support to someone after their stroke event. Stroke survivors will be defined as an individual who has experienced a stroke event. Studies which report on mixed populations, such as reporting on carers' and stroke survivors' unmet needs, will be included in full text review to investigate if the carers of stroke survivors' data can be extracted separately. Studies will be included if carers provide information related to their unmet needs at any stage of caring for someone following a stroke. Manuscripts that only report on professional carers (doctors, nurses, healthcare providers and others) will be excluded.

### **Measures**

Quantitative and qualitative studies that report any unmet needs of carers of stroke survivors will be included. Quantitative studies may include self-report surveys. Qualitative studies may include interviews and focus groups. We aim to (1) quantify the proportion of carers of stroke survivors reporting unmet needs in various domains and subcategories; (2) categorise carers of stroke survivors' unmet needs by domain; and (3) identify the main variables associated with reporting more unmet needs in carers of stroke survivors.

Unmet needs domains of carers of stroke survivors will be based on Lambert et al<sup>38</sup> which investigated the unmet needs of carers of adult cancer patients. These include unmet needs relating to changes in role and relationship(s), and informational unmet needs, such as preparedness in caring for someone with a chronic illness, and comprehensive knowledge of

1  
2  
3 the condition. As carers of stroke survivors may also have unique needs that differ from being  
4 a carer of cancer survivors, other themes that emerge will also be analysed. These needs may  
5 include managing the loss of mobility<sup>39</sup>, language<sup>40</sup> and mood/personality changes<sup>41</sup> as these  
6 changes are common following a stroke event.  
7  
8  
9  
10

### 11 **Search Strategy**

12  
13  
14  
15 ‘Stroke’ terms based on a Cochrane Review<sup>42</sup> will be developed. ‘Needs’ and ‘Partners and  
16 Caregivers’ terms will be based on a systematic review of unmet needs of partners and  
17 caregivers diagnosed with cancer<sup>27</sup>. In May 2017, a search strategy was developed on the  
18 MEDLINE database and then adapted for the other databases. This included medical subject  
19 headings (MeSH) and free-text terms using applicable controlled vocabulary. The following  
20 electronic databases will be searched: Medline, PsycINFO, EMBASE, Allied and  
21 Complementary Medicine Database (AMED), Cumulative Index to Nursing and Allied  
22 Health Literature (CINAHL), Scopus and Cochrane Database. Furthermore, the reference  
23 lists of included studies or identified relevant reviews will be searched. There will be no time  
24 limits on publications for the search strategy. Studies will be limited to those conducted  
25 among human subjects and published in English. Reference lists of included studies and  
26 relevant systematic reviews will be searched to identify additional studies for potential  
27 inclusion in this systematic review. The search terms for MEDLINE can be found in  
28 Appendix A.  
29  
30  
31  
32  
33  
34  
35  
36  
37  
38  
39  
40  
41  
42  
43  
44  
45  
46

### 47 **Screening the studies**

48  
49  
50 Search results will be entered into Endnote folders, and any duplicates will be removed. The  
51 online tool Covidence<sup>43</sup> will be used by reviewers to produce high-quality evidence for the  
52 systematic review. A flow diagram conforming to PRISMA guidelines<sup>36</sup> will report the  
53 selection process and reasons for exclusion. All titles of retrieved publications will be  
54  
55  
56  
57  
58  
59  
60

1  
2  
3 screened by one reviewer. Two reviewers will independently screen all abstracts, full text and  
4  
5 data extraction. The two will meet to resolve any issues, and if a decision cannot be made, a  
6  
7 third reviewer will be contacted to make the final decision.  
8  
9

### 10 **Data extraction**

11  
12  
13 Data will be extracted by one reviewer, tabled, and checked for accuracy by another  
14  
15 reviewer. The two reviewers will discuss these findings and themes, and if a discrepancy  
16  
17 exists and a consensus cannot be reached, a third reviewer will be contacted to make the final  
18  
19 decision. Data extracted from the quantitative studies will be extracted and analysed. Data  
20  
21 from the qualitative, quantitative and mixed-method studies will be integrated in a systematic  
22  
23 way. Common data extracted from the articles will include: study aims, setting, sample  
24  
25 characteristics, response rates, study methodology, data analysis, primary outcomes and the  
26  
27 unmet needs domains identified. Data extraction tables will be based on Lambert et al.'s  
28  
29 research of the unmet needs of carers of adults with cancer<sup>38</sup>.  
30  
31  
32

### 33 **Quality appraisal**

#### 34 *Qualitative Studies*

35  
36  
37 The methodological quality of qualitative studies will be assessed using the Critical Appraisal  
38  
39 Skills Programme (CASP)<sup>44</sup>. This quality assessment tool was cited by Aziz et al.<sup>12</sup> in the  
40  
41 protocol for a systematic review in understanding stroke survivors' and informal carers'  
42  
43 experiences of and need for primary care and community health services. The CASP tool is a  
44  
45 10-item tool that allows rapid evaluation of the credibility, transferability, dependability and  
46  
47 conformability of the qualitative studies. Two reviewers will assess the methodological  
48  
49 quality of all studies, and if an agreement cannot be reached, a third reviewer will make the  
50  
51 final decision.  
52  
53  
54  
55  
56

#### 57 *Quantitative studies*

1  
2  
3 The methodological quality of quantitative studies will be assessed based on Greenwood et  
4 al<sup>14</sup> who performed a systematic review of the quantitative studies focused on factors  
5 influencing informal carers of stroke survivors. This quality assessment tool assesses six  
6 areas (1) statement of inclusion or exclusion criteria of carers; (2) clear  
7 hypotheses/hypothesis; (3) response rate reported or possible to calculate; (4) multivariate  
8 analysis/possible control for confounders; (5) full definition of carer provided (including  
9 spouse as the definition; and (6) timing of assessment similar for all participants. Studies are  
10 either scored “Yes” with a value of 1, or “No” with a value of 0. Scores are rated on a 6-point  
11 scale: a score of 6 indicates a maximum score, whereas a score 0 indicates a minimum score.  
12  
13  
14  
15  
16  
17  
18  
19  
20  
21  
22

### 23 *Mixed-method studies*

24  
25  
26 The methodological quality of mixed-method studies will be assessed by using the CASP<sup>44</sup>  
27 on qualitative components, and the methodological assessment developed by Greenwood et  
28 al.<sup>14</sup> where appropriate regarding quantitative components.  
29  
30  
31  
32

### 33 **Data analysis**

#### 34 *Qualitative studies*

35  
36  
37 Qualitative data will be thematically analysed using the qualitative research software  
38 NVivo<sup>45</sup>. Reviewers will develop descriptive themes through interpretation of the meaningful  
39 patterns in the qualitative research. Codes for unmet needs domains will be assigned to  
40 meaning within the text, and these codes will be compared between studies. Two reviewers  
41 will discuss these meanings, and a third reviewer will be consulted if an agreement cannot be  
42 reached.  
43  
44  
45  
46  
47  
48  
49  
50  
51

#### 52 *Quantitative studies*

1  
2  
3 The data analysis of quantitative studies in this review will be based on Lambert et al<sup>38</sup>.  
4  
5 Results across quantitative studies will be pooled and the prevalence of unmet needs will be  
6  
7 compiled. Unmet needs domains will be categorised and the factors associated within them  
8  
9 will be examined. Where reported, the average number of unmet needs will be reported. To  
10  
11 facilitate comparison across studies and where appropriate, averages will be standardised  
12  
13 from 0 to 100. Comparable unmet needs will be combined and clustered into domains. Two  
14  
15 reviewers will discuss these outcomes, and a third reviewer will be consulted if a decision  
16  
17 cannot be reached.  
18  
19

### 20 21 *Mixed-method studies*

22  
23  
24 The data of mixed-method studies will be analyzed appropriately. Qualitative components  
25  
26 will be analyzed using NVivo<sup>45</sup>, and quantitative components will be based on the data  
27  
28 analysis reported by Lambert et al<sup>38</sup>.  
29  
30

## 31 **DISCUSSION**

32  
33  
34 Evidence from this systematic review of unmet needs of carers of stroke survivors will  
35  
36 inform the development of interventions and services to address these needs. We will deliver  
37  
38 evidence-based recommendations including consideration of the unmet needs of carers of  
39  
40 stroke survivors in future research, and the refinement and development of interventions and  
41  
42 services for this population. These recommendations may improve carer preparedness for  
43  
44 their new caregiving role, and also assist in supporting carers across all time points of caring  
45  
46 for a person who has survived a stroke. These improvements may subsequently improve the  
47  
48 quality of life of carers by assisting carers to manage their own needs, mental and physical  
49  
50 health, and increase their knowledge in providing physical, emotional and practical care for  
51  
52 the stroke survivor. To our knowledge, this will be the first study to systematically synthesize  
53  
54  
55  
56  
57  
58  
59  
60



1  
2  
3 qualitative and quantitative information regarding the unmet needs of carers of stroke  
4  
5 survivors.  
6

### 7 8 **Strengths and limitations** 9

10  
11 The findings of this systematic review are dependent on the quality of original studies that  
12  
13 will be reviewed. As there are few valid and reliable measures for assessing methodological  
14  
15 rigor of qualitative research <sup>2</sup> and mixed-method assessment <sup>3</sup> there is a risk that flawed  
16  
17 studies may bias the results of the systematic review. To minimise this, reviewers will  
18  
19 independently review studies and communicate effectively if disagreements occur. It is also  
20  
21 possible that there are relevant non-English studies that will not be included in this review.  
22  
23 As such, these findings may not be generalizable to non-English speaking populations, in  
24  
25 which there may be differing cultural unmet needs of carers of stroke survivors.  
26  
27

28  
29 The quality of the review will be strengthened by the input and involvement of  
30  
31 multiple reviewers at each stage of the review. Furthermore, the inclusion of both qualitative  
32  
33 and quantitative studies will provide more informative findings on the unmet needs of carers  
34  
35 of stroke survivors. Our chosen method of analysing and synthesising qualitative and  
36  
37 quantitative data has been tested and found effective for systematic reviews <sup>1</sup>. The findings of  
38  
39 this systematic review will be disseminated publicly and in peer-reviewed journals, and may  
40  
41 be the topic of research presentations.  
42  
43  
44  
45  
46  
47  
48  
49  
50  
51  
52  
53  
54  
55  
56  
57  
58  
59  
60

## Amendments

If the protocol needs to be amended, the date of each amendment, the change and the rationale will be described in this section.

## Contributorship Statement

AMJD is the guarantor of the review. AMJD, ALB, NS, AG, OW, AT, PM and BB assisted in writing the protocol. AMJD performed preliminary data searches, will perform data extraction, conduct quality assessments and draft the systematic review paper. All authors contributed to the design and conception of this review. All authors approved the protocol final manuscript and will offer critical revisions for the review manuscript.

## Funding

This work was supported by a project grant from the National Health and Medical Research Council (NHMRC) of Australia (GNT1045840) and partnership support from the Cancer Council NSW to BB. BB is supported by an Australian National Health and Medical Research Council (NHMRC) Career Development Fellowship (GNT1063206) and a Faculty of Health and Medicine, University of Newcastle Gladys M Brawn Career Development Fellowship. AMJD is supported by a Research Training Program (RTP), University of Newcastle PhD Scholarship. ALB is supported by an Australian NHMRC Senior Research Fellowship and a Faculty of Health and Medicine, University of Newcastle Gladys M Brawn Senior Research Fellowship. NJS is an Australian National Health and Medical Research Council (NHMRC) Career Development / National Heart Foundation (NHF) co-funded Career Development/Future Leader Fellow APPS1110629/ 100827.

## Competing interests

The authors declare that they have no competing interests.

## References

1. Twyman L, Bonevski B, Paul C, et al. Perceived barriers to smoking cessation in selected vulnerable groups: a systematic review of the qualitative and quantitative literature. *BMJ Open* 2014;4(12):e006414.
2. Tong A, Flemming K, McInnes E, et al. Enhancing transparency in reporting the synthesis of qualitative research: ENTREQ. *BMC medical research methodology* 2012;12(1):181.
3. O'Cathain A, Murphy E, Nicholl J. The quality of mixed methods studies in health services research. *Journal of Health Services Research & Policy* 2008;13(2)
4. National Stroke Foundation. National Stroke Audit – Rehabilitation Services Report Melbourne, Victoria, 2012.
5. Australian Bureau of Statistics. Disability, Ageing and Carers, Australia: Summary of Findings, 2015, 2015.
6. Deloitte Access Economics. The economic impact of stroke in Australia. Barton, Australian Capital Territory, 2013.
7. Carers UK. Valuing carers 2011- calculating the value of carers' support Carers UK, London; 2011., 2011.
8. Carers UK. Facts about caring. Policy briefing 2009., 2009.
9. The National Alliance for Caregiving (NAC) and the AARP Public Policy Institute. Caregiving in the U.S. 2015 Final Report, 2015.
10. Stroke Wise. Caregivers for stroke survivors [Available from: <http://www.strokewise.info/2009/10/caregivers.html>].
11. American Stroke Association. National Family Caregivers.
12. Aziz NA, Pindus DM, Mullis R, et al. Understanding stroke survivors' and informal carers' experiences of and need for primary care and community health services-a systematic review of the qualitative literature: Protocol. *BMJ Open* 2016;6(1) doi: 10.1136/bmjopen-2015-009244
13. Low J, Payne S, Roderick P. The impact of stroke on informal carers: a literature review. *Social Science and Medicine* 1999;49(6):711-25.
14. Greenwood N, Mackenzie A, Cloud GC, et al. Informal carers of stroke survivors—factors influencing carers: a systematic review of quantitative studies. *Disability and rehabilitation* 2008;30(18):1329-49.
15. International Alliance of Carer Organizations. Global Carer Facts 2015 [Available from: [http://www.internationalcarers.org/carer-facts/global-carer-stats/#\\_ednref4](http://www.internationalcarers.org/carer-facts/global-carer-stats/#_ednref4)].
16. Cameron JI, Naglie G, Silver FL, et al. Stroke family caregivers' support needs change across the care continuum: A qualitative study using the timing it right framework. *Disability and Rehabilitation* 2013;35(4):315-24. doi: 10.3109/09638288.2012.691937
17. Lou S, Carstensen K, Jørgensen CR, et al. Stroke patients' and informal carers' experiences with life after stroke: an overview of qualitative systematic reviews. *Disability & Rehabilitation* 2017;39(3):301-13. doi: 10.3109/09638288.2016.1140836
18. Danzl MM, Harrison A, Hunter EG, et al. "A Lot of Things Passed Me by": Rural Stroke Survivors' and Caregivers' Experience of Receiving Education From Health Care Providers. *Journal of Rural Health* 2016;32(1):13-24. doi: 10.1111/jrh.12124
19. Danzl MM, Hunter EG, Campbell S, et al. "Living with a ball and chain": The experience of stroke for individuals and their caregivers in rural appalachian kentucky. *Journal of Rural Health* 2013;29(4):368-82. doi: 10.1111/jrh.12023

20. Han B, Haley WE. Family caregiving for patients with stroke. *Stroke* 1999;30(7):1478-85.
21. Salter K, Zettler L, Foley N, et al. Impact of caring for individuals with stroke on perceived physical health of informal caregivers. *Disability and rehabilitation* 2010;32(4):273-81.
22. Rigby H, Gubitz G, Phillips S. A systematic review of caregiver burden following stroke. *International Journal of Stroke* 2009;4(4):285-92.
23. Australian Institute of Family Studies. The nature and impact of caring for family members with a disability in Australia. Research Report No 16 – June 2008, 2008.
24. King RB. The Stroke Caregiver Unmet Resource Needs Scale: Development and Psychometric Testing. *Journal of Neuroscience Nursing* 2015;47(4) doi: <https://dx.doi.org/10.1097/JNN.000000000000153>
25. Bakas T, Austin JK, Okonkwo KF, et al. Needs, concerns, strategies, and advice of stroke caregivers the first 6 months after discharge. *Journal of Neuroscience Nursing* 2002;34(5):242-51.
26. Coombs UE. Spousal caregiving for stroke survivors. *Journal of Neuroscience Nursing* 2007;39(2):112-19.
27. Lambert SD, Harrison JD, Smith E, et al. The unmet needs of partners and caregivers of adults diagnosed with cancer: a systematic review. *BMJ supportive & palliative care* 2012;bmj.spcare-2012-000226.
28. Eldred C, Sykes C. Psychosocial interventions for carers of survivors of stroke: A systematic review of interventions based on psychological principles and theoretical frameworks. *British Journal of Health Psychology* 2008;13(3):563-81. doi: 10.1348/135910707X236899
29. Aldehaim AY, Alotaibi FF, Uphold CR, et al. The impact of technology-based interventions on informal caregivers of stroke survivors: A systematic review. *Telemedicine and e-Health* 2016;22(3):223-31. doi: <http://dx.doi.org/10.1089/tmj.2015.0062>
30. Lutz BJ, Young M, Cox KJ, et al. The crisis of stroke: Experiences of patients and their family caregivers. *Topics in Stroke Rehabilitation* 2011;18(6):786-97. doi: 10.1310/tsr1806-786
31. Young ME, Lutz BJ, Creasy KR, et al. A comprehensive assessment of family caregivers of stroke survivors during inpatient rehabilitation. *Disability and Rehabilitation* 2014;36(22):1892-902. doi: 10.3109/09638288.2014.881565
32. Bakas T, Champion V. Development and psychometric testing of the Bakas Caregiving Outcomes Scale. *Nursing research* 1999;48(5):250-59.
33. Brereton L. Preparation for family care giving: stroke as a paradigm case. *Journal of clinical nursing* 1997;6(6):425-34.
34. Moher D, Shamseer L, Clarke M, et al. Preferred reporting items for systematic review and meta-analysis protocols (PRISMA-P) 2015 statement. *Systematic reviews* 2015;4(1):1.
35. Shamseer L, Moher D, Clarke M, et al. Preferred reporting items for systematic review and meta-analysis protocols (PRISMA-P) 2015: elaboration and explanation. *Bmj* 2015;349:g7647.
36. Moher D, Liberati A, Tetzlaff J, et al. Preferred reporting items for systematic reviews and meta-analyses: The prisma statement. *Annals of Internal Medicine* 2009;151(4):264-69. doi: 10.7326/0003-4819-151-4-200908180-00135
37. Liberati A, Altman DG, Tetzlaff J, et al. The PRISMA statement for reporting systematic reviews and meta-analyses of studies that evaluate health care interventions: explanation and elaboration. *PLoS medicine* 2009;6(7):e1000100.

- 1  
2  
3 38. Lambert SD, Harrison JD, Smith E, et al. The unmet needs of partners and caregivers of  
4 adults diagnosed with cancer: a systematic review. *BMJ Supportive & Palliative Care*  
5 2012;2(3):224-30.  
6  
7 39. Craig LE, Wu O, Bernhardt J, et al. Predictors of poststroke mobility: systematic review.  
8 *International Journal of Stroke* 2011;6(4):321-27. doi: 10.1111/j.1747-  
9 4949.2011.00621.x  
10  
11 40. Anderson S, Marlett NJ. The language of recovery: How effective communication of  
12 information is crucial to restructuring post-stroke life. *Topics in Stroke Rehabilitation*  
13 2004;11(4):55-67. doi: 10.1310/NPC4-01YV-P66Q-VM9R  
14  
15 41. Andrewes D, Turner M. Mood and social skills improvement in depressed stroke patients  
16 following interpersonal emotional communication training. *Brain Impairment*  
17 2011;12:67.  
18  
19 42. Lager KE, Mistri AK, Khunti K, et al. Interventions for improving modifiable risk factor  
20 control in the secondary prevention of stroke. *The Cochrane Library* 2014  
21  
22 43. Covidence systematic review software. Melbourne, Australia: Veritas Health Innovation;  
23 [Available from: [www.covidence.org](http://www.covidence.org).  
24  
25 44. Critical Appraisal Skills Programme (CASP). Critical Appraisal Skills Programme  
26 (CASP) Qualitative Research Checklist. Secondary: Critical Appraisal Skills  
27 Programme (CASP) Qualitative Research Checklist., 2013.  
28  
29 45. QRS International. [Available from: <http://www.qsrinternational.com/>.  
30  
31  
32  
33  
34  
35  
36  
37  
38  
39  
40  
41  
42  
43  
44  
45  
46  
47  
48  
49  
50  
51  
52  
53  
54  
55  
56  
57  
58  
59  
60

### Appendix A. MEDLINE Search Strategy

| No. | Search Item                                                                                                                                                         |
|-----|---------------------------------------------------------------------------------------------------------------------------------------------------------------------|
| 1   | (cva\$ or stroke\$ or poststroke\$ or post-stroke\$ or post stroke\$ or transient isch?emic attack\$ or TIA\$ or ministroke\$ or ministroke\$ or mini stroke\$).mp. |
| 2   | (cerebrovascular\$ or cerebral vascular).tw.                                                                                                                        |
| 3   | (cerebral or cerebellar or brain\$ or vertebrobasilar) adj5 (infarct\$ or isch?emi\$ or thrombo\$ or apoplexy or emboli\$).tw                                       |
| 4   | (cerebral or intracerebral or intracranial or brain\$ or cerebellar or subarachnoid) adj5 (accident\$ or h?emorrhag\$).tw                                           |
| 5   | 1 or 2 or 3 or 4                                                                                                                                                    |
| 6   | Need.mp.                                                                                                                                                            |
| 7   | Needs.mp.                                                                                                                                                           |
| 8   | 6 or 7                                                                                                                                                              |
| 9   | Support person.mp.                                                                                                                                                  |
| 10  | Wife.mp.                                                                                                                                                            |
| 11  | Wives.mp.                                                                                                                                                           |
| 12  | Husband*.mp.                                                                                                                                                        |
| 13  | Close relative*.mp.                                                                                                                                                 |
| 14  | Next of kin*.mp.                                                                                                                                                    |
| 15  | Significant other*.mp.                                                                                                                                              |
| 16  | Relative*.mp.                                                                                                                                                       |
| 17  | Caregiver*.mp.                                                                                                                                                      |
| 18  | Carer*.mp.                                                                                                                                                          |
| 19  | Famil*.mp.                                                                                                                                                          |
| 20  | 9 or 10 or 11 or 12 or 13 or 14 or 15 or 16 or 17 or 18 or 19                                                                                                       |
| 21  | 5 and 8 and 20                                                                                                                                                      |
| 22  | limit 21 to (english language and humans)                                                                                                                           |

1  
2  
3  
4  
5  
6  
7  
8  
9  
10  
11  
12  
13  
14  
15  
16  
17  
18  
19  
20  
21  
22  
23  
24  
25  
26  
27  
28  
29  
30  
31  
32  
33  
34  
35  
36  
37  
38  
39  
40  
41  
42  
43  
44  
45  
46  
47  
48  
49

**PRISMA-P (Preferred Reporting Items for Systematic review and Meta-Analysis Protocols) 2015 checklist: recommended items to address in a systematic review protocol\***

| Section and topic                 | Item No | Checklist item                                                                                                                                                                                                                | Page      |
|-----------------------------------|---------|-------------------------------------------------------------------------------------------------------------------------------------------------------------------------------------------------------------------------------|-----------|
| <b>ADMINISTRATIVE INFORMATION</b> |         |                                                                                                                                                                                                                               |           |
| Title:                            |         |                                                                                                                                                                                                                               |           |
| Identification                    | 1a      | Identify the report as a protocol of a systematic review                                                                                                                                                                      | 1         |
| Update                            | 1b      | If the protocol is for an update of a previous systematic review, identify as such                                                                                                                                            |           |
| Registration                      | 2       | If registered, provide the name of the registry (such as PROSPERO) and registration number                                                                                                                                    | 9         |
| Authors:                          |         |                                                                                                                                                                                                                               |           |
| Contact                           | 3a      | Provide name, institutional affiliation, e-mail address of all protocol authors; provide physical mailing address of corresponding author                                                                                     | 1-3       |
| Contributions                     | 3b      | Describe contributions of protocol authors and identify the guarantor of the review                                                                                                                                           | 16        |
| Amendments                        | 4       | If the protocol represents an amendment of a previously completed or published protocol, identify as such and list changes; otherwise, state plan for documenting important protocol amendments                               | 16        |
| Support:                          |         |                                                                                                                                                                                                                               |           |
| Sources                           | 5a      | Indicate sources of financial or other support for the review                                                                                                                                                                 | 16        |
| Sponsor                           | 5b      | Provide name for the review funder and/or sponsor                                                                                                                                                                             | 16        |
| Role of sponsor or funder         | 5c      | Describe roles of funder(s), sponsor(s), and/or institution(s), if any, in developing the protocol                                                                                                                            |           |
| <b>INTRODUCTION</b>               |         |                                                                                                                                                                                                                               |           |
| Rationale                         | 6       | Describe the rationale for the review in the context of what is already known                                                                                                                                                 | 6-8       |
| Objectives                        | 7       | Provide an explicit statement of the question(s) the review will address with reference to participants, interventions, comparators, and outcomes (PICO)                                                                      | 8-9       |
| <b>METHODS</b>                    |         |                                                                                                                                                                                                                               |           |
| Eligibility criteria              | 8       | Specify the study characteristics (such as PICO, study design, setting, time frame) and report characteristics (such as years considered, language, publication status) to be used as criteria for eligibility for the review | 9-11      |
| Information sources               | 9       | Describe all intended information sources (such as electronic databases, contact with study authors, trial registers or other grey literature sources) with planned dates of coverage                                         | 11        |
| Search strategy                   | 10      | Present draft of search strategy to be used for at least one electronic database, including planned limits,                                                                                                                   | 11 and 20 |

|                                    |     |                                                                                                                                                                                                                                                  |       |
|------------------------------------|-----|--------------------------------------------------------------------------------------------------------------------------------------------------------------------------------------------------------------------------------------------------|-------|
|                                    |     | such that it could be repeated                                                                                                                                                                                                                   |       |
| Study records:                     |     |                                                                                                                                                                                                                                                  |       |
| Data management                    | 11a | Describe the mechanism(s) that will be used to manage records and data throughout the review                                                                                                                                                     | 11-14 |
| Selection process                  | 11b | State the process that will be used for selecting studies (such as two independent reviewers) through each phase of the review (that is, screening, eligibility and inclusion in meta-analysis)                                                  | 11-14 |
| Data collection process            | 11c | Describe planned method of extracting data from reports (such as piloting forms, done independently, in duplicate), any processes for obtaining and confirming data from investigators                                                           | 12    |
| Data items                         | 12  | List and define all variables for which data will be sought (such as PICO items, funding sources), any pre-planned data assumptions and simplifications                                                                                          |       |
| Outcomes and prioritization        | 13  | List and define all outcomes for which data will be sought, including prioritization of main and additional outcomes, with rationale                                                                                                             | 10-11 |
| Risk of bias in individual studies | 14  | Describe anticipated methods for assessing risk of bias of individual studies, including whether this will be done at the outcome or study level, or both; state how this information will be used in data synthesis                             | 12-14 |
| Data synthesis                     | 15a | Describe criteria under which study data will be quantitatively synthesised                                                                                                                                                                      | 12-14 |
|                                    | 15b | If data are appropriate for quantitative synthesis, describe planned summary measures, methods of handling data and methods of combining data from studies, including any planned exploration of consistency (such as $I^2$ , Kendall's $\tau$ ) |       |
|                                    | 15c | Describe any proposed additional analyses (such as sensitivity or subgroup analyses, meta-regression)                                                                                                                                            |       |
|                                    | 15d | If quantitative synthesis is not appropriate, describe the type of summary planned                                                                                                                                                               | 15    |
| Meta-bias(es)                      | 16  | Specify any planned assessment of meta-bias(es) (such as publication bias across studies, selective reporting within studies)                                                                                                                    |       |
| Confidence in cumulative evidence  | 17  | Describe how the strength of the body of evidence will be assessed (such as GRADE)                                                                                                                                                               | 12-14 |

**\* It is strongly recommended that this checklist be read in conjunction with the PRISMA-P Explanation and Elaboration (cite when available) for important clarification on the items. Amendments to a review protocol should be tracked and dated. The copyright for PRISMA-P (including checklist) is held by the PRISMA-P Group and is distributed under a Creative Commons Attribution Licence 4.0.**

*From: Shamseer L, Moher D, Clarke M, Ghersi D, Liberati A, Petticrew M, Shekelle P, Stewart L, PRISMA-P Group. Preferred reporting items for systematic review and meta-analysis protocols (PRISMA-P) 2015: elaboration and explanation. BMJ. 2015 Jan 2;349(jan02 1):g7647.*



# BMJ Open

## A protocol for a systematic review of quantitative and qualitative studies of the unmet needs of informal carers of stroke survivors

|                                 |                                                                                                                                                                                                                                                                                                                                                                                                                                                                                                                                                                                             |
|---------------------------------|---------------------------------------------------------------------------------------------------------------------------------------------------------------------------------------------------------------------------------------------------------------------------------------------------------------------------------------------------------------------------------------------------------------------------------------------------------------------------------------------------------------------------------------------------------------------------------------------|
| Journal:                        | <i>BMJ Open</i>                                                                                                                                                                                                                                                                                                                                                                                                                                                                                                                                                                             |
| Manuscript ID                   | bmjopen-2017-019571.R1                                                                                                                                                                                                                                                                                                                                                                                                                                                                                                                                                                      |
| Article Type:                   | Protocol                                                                                                                                                                                                                                                                                                                                                                                                                                                                                                                                                                                    |
| Date Submitted by the Author:   | 25-Oct-2017                                                                                                                                                                                                                                                                                                                                                                                                                                                                                                                                                                                 |
| Complete List of Authors:       | Denham, Alexandra; University of Newcastle, School of Medicine and Public Health<br>Baker, Amanda; University of Newcastle,<br>Spratt, Neil; University of Newcastle, School of Biomedical Sciences and Pharmacy<br>Guillaumier, Ashleigh; University of Newcastle, School of Medicine & Public Health<br>Wynne, Olivia; University of Newcastle<br>Turner, Alyna; University of Newcastle, School of Medicine and Public Health<br>Magin, Parker; University of Newcastle, Discipline of General Practice<br>Bonevski, Billie; University of Newcastle, School of Medicine & Public Health |
| <b>Primary Subject Heading</b>: | Public health                                                                                                                                                                                                                                                                                                                                                                                                                                                                                                                                                                               |
| Secondary Subject Heading:      | Public health                                                                                                                                                                                                                                                                                                                                                                                                                                                                                                                                                                               |
| Keywords:                       | Stroke < NEUROLOGY, Carers, QUALITATIVE RESEARCH, Quantitative research, Systematic review                                                                                                                                                                                                                                                                                                                                                                                                                                                                                                  |
|                                 |                                                                                                                                                                                                                                                                                                                                                                                                                                                                                                                                                                                             |

SCHOLARONE™  
Manuscripts

1  
2  
3 **A protocol for a systematic review of quantitative and qualitative studies of the unmet**  
4  
5 **needs of informal carers of stroke survivors**  
6  
7

8 Authors: Alexandra M.J. Denham<sup>1</sup>; Amanda L. Baker<sup>1</sup>; Neil J. Spratt<sup>2</sup>; Ashleigh  
9  
10 Guillaumier<sup>1</sup>; Olivia Wynne<sup>1</sup>; Alyna Turner<sup>1</sup>; Parker Magin<sup>1</sup>; Billie Bonevski<sup>1</sup>  
11

12  
13 <sup>1</sup>School of Medicine and Public Health, Faculty of Health and Medicine, University of  
14  
15 Newcastle & Hunter Medical Research Institute, Callaghan, NSW 2308, Australia.  
16

17  
18 <sup>2</sup> School of Biomedical Sciences and Pharmacy, University of Newcastle, University Drive,  
19  
20 Callaghan, NSW 2308, Australia.  
21

22  
23  
24  
25  
26 Corresponding Author Name: Alexandra M.J. Denham  
27

28  
29 Institutional affiliation: School of Medicine and Public Health, Faculty of Health and  
30  
31 Medicine, University of Newcastle & Hunter Medical Research Institute, Callaghan, NSW  
32  
33 2308, Australia.  
34

35  
36 E-mail address: Alexandra.Denham@newcastle.edu.au  
37

38  
39 Mail address: Level 5 McAuley Building Calvary Mater Hospital  
40  
41 Waratah, NSW, 2298,  
42  
43 Australia  
44

45  
46  
47 Name: Amanda L. Baker  
48

49  
50 Institutional affiliation: School of Medicine and Public Health, Faculty of Health and  
51  
52 Medicine, University of Newcastle & Hunter Medical Research Institute, Callaghan, NSW  
53  
54 2308, Australia.  
55

56  
57 E-mail address: Amanda.Baker@newcastle.edu.au  
58  
59  
60

1  
2  
3 Name: Neil J. Spratt  
4

5  
6 Institutional affiliation: School of Biomedical Sciences and Pharmacy, University of  
7  
8 Newcastle, University Drive, Callaghan, NSW 2308, Australia.  
9

10  
11 E-mail address: Neil.Spratt@newcastle.edu.au  
12

13  
14  
15  
16  
17 Name: Ashleigh Guillaumier  
18

19  
20 Institutional affiliation: School of Medicine and Public Health, Faculty of Health and  
21  
22 Medicine, University of Newcastle & Hunter Medical Research Institute, Callaghan, NSW  
23  
24 2308, Australia.  
25

26  
27 E-mail address: Ashleigh.Guillaumier@newcastle.edu.au  
28

29  
30  
31  
32 Name: Olivia Wynne  
33

34  
35 Institutional affiliation: School of Medicine and Public Health, Faculty of Health and  
36  
37 Medicine, University of Newcastle & Hunter Medical Research Institute, Callaghan, NSW  
38  
39 2308, Australia.  
40

41  
42  
43 E-mail address: Olivia.Wynne@newcastle.edu.au  
44

45  
46  
47  
48 Name: Alyna Turner  
49

50  
51 Institutional affiliation: School of Medicine and Public Health, Faculty of Health and  
52  
53 Medicine, University of Newcastle & Hunter Medical Research Institute, Callaghan, NSW  
54  
55 2308, Australia.  
56

57  
58 E-mail address: Alyna.Turner@newcastle.edu.au  
59  
60

1  
2  
3 Name: Parker Magin  
4

5  
6 Institutional affiliation: School of Medicine and Public Health, Faculty of Health and  
7  
8 Medicine, University of Newcastle & Hunter Medical Research Institute, Callaghan, NSW  
9  
10 2308, Australia.  
11

12  
13 E-mail address: Parker.Magin@newcastle.edu.au  
14  
15

16  
17  
18  
19 Name: Billie Bonevski  
20

21  
22 Institutional affiliation: School of Medicine and Public Health, Faculty of Health and  
23  
24 Medicine, University of Newcastle & Hunter Medical Research Institute, Callaghan, NSW  
25  
26 2308, Australia.  
27

28  
29 E-mail address: Billie.Bonevski@newcastle.edu.au  
30  
31  
32  
33  
34  
35  
36  
37  
38  
39  
40  
41  
42  
43  
44  
45  
46  
47  
48  
49  
50  
51  
52  
53  
54  
55  
56  
57  
58  
59  
60

## Abstract

**Introduction:** Stroke events deeply affect not only the stroke survivor but also the quality of life, and physical and psychological health of the family and friends who care for them. There is a need for further information about the unmet needs of these informal carers in order to develop support services and interventions. The primary objective of this review is to report and synthesise the research describing the unmet needs of carers of stroke survivors.

**Methods and Analysis:** A systematic review of quantitative and qualitative studies that report on the unmet needs of carers will be conducted. The following databases will be searched for relevant articles: MEDLINE, Cumulative Index to Nursing and Allied Health Literature (CINAHL), PsycINFO, Embase, Allied and Complementary Medicine Database (AMED), and Scopus. No publication date constraints will be applied. Studies will be limited to those published in English and conducted among humans. Eligible studies will report on the unmet needs of informal carers of stroke survivors, defined as family members, friends and other unpaid caregivers. Studies which focus on formal, clinical or medical caregivers will be excluded. A narrative synthesis of the main outcomes will be reported.

**Ethics and Dissemination:** This review will be submitted to a peer-reviewed journal. Our findings are expected to provide new insights into the unmet needs of stroke survivors' carers. Knowledge about the unmet needs of carers will inform the development and refinement of interventions and services to address these needs and better support carers of stroke survivors. The findings of this systematic review will be disseminated publicly and in peer-reviewed journals, and may be the topic of research presentations.

**Trial registration number:** CRD42017067391.

## Strengths and limitations of this study

### Strengths

- The inclusion of both qualitative and quantitative studies will provide more informative findings on the unmet needs of carers of stroke survivors.
- Our chosen method of analysing and synthesising qualitative and quantitative data has been tested and found effective for systematic reviews.
- The quality of the review will be strengthened by the input and involvement of multiple reviewers at each stage of the review

### Limitations

- As there are few valid and reliable measures for assessing methodological rigor of qualitative research and mixed-method assessment there is a risk that flawed studies may bias the results of the systematic review.
- It is also possible that there are relevant non-English studies that will not be included in this review, therefore these findings may not be generalizable to non-English speaking populations in which there may be differing cultural unmet needs of carers of stroke survivors

## INTRODUCTION

### Rationale

As stroke survivors are often cognitively or physically disabled post-stroke, many require a carer to support them once discharged from acute care. Approximately 50% of people who have a stroke will require support from a carer<sup>1</sup>, and the three most common areas that stroke survivors report needing assistance in are cognitive or emotional tasks, mobility and health care<sup>2</sup>. The Australian Survey of Disability, Ageing and Carers identified that 2.86 million Australians are informal carers, and 26,367 of these people have taken on the role of caregiver for someone with stroke as their main condition<sup>3</sup>. In England and Wales, it is estimated that 10% of the population are carers, with 60% of people becoming carers at some point<sup>4,5</sup>. In the United States, it is estimated that 4.35 million people are informal carers<sup>6</sup>, and of those, 2.2 million are people who care for someone who has had a stroke<sup>7,8</sup>. These numbers are expected to increase with demographic changes worldwide<sup>3,5,7</sup>, therefore it is becoming increasingly important to recognise the ongoing support needs of carers of stroke survivors.

There are a number of definitions of “carers” across stroke studies<sup>9,10</sup>, generally they are referred to as informal, unpaid or primary carers, or as caregivers. Carers of stroke survivors may be family members, friends or other close individuals who provide physical or emotional support<sup>10</sup>. Informal carers (defined as people who provide unpaid care, support and/or assistance to someone in need of care) of stroke survivors are predominantly female spouses of the stroke survivor<sup>11</sup>, and often take on a variety of complex tasks and roles, including physical, psychological, and daily living support with varying time commitments. The average time spent caring for someone with stroke has been reported to be 41 hours per week<sup>3</sup>. Furthermore, the replacement financial value of informal care across countries is

1  
2  
3 staggering. If all hours of informal care were replaced with services purchased from formal  
4 care providers, the value would be \$60.3 billion in Australia<sup>3</sup>, £119 billion pounds in the  
5 United Kingdom<sup>4</sup> and \$470 billion in the United States<sup>12</sup>.  
6  
7  
8  
9

10 Caring for someone who has had a stroke can lead to issues and concerns for the carer,  
11 and these issues can also change over time<sup>13</sup>. For example, when carers must put aside their  
12 own needs to care for the stroke survivor, they can experience a sense of loss of autonomy<sup>14</sup>.  
13 Carers often report feeling underprepared to provide practical support following the patient's  
14 discharge from hospital, and also report feeling excluded from discharge and follow-up plans  
15 with health providers<sup>14-16</sup>. As a result, carers commonly experience a decline in their own  
16 physical and mental health, and a reduced quality of life<sup>17-19</sup>. As psychological distress is  
17 becoming increasingly common and health outcomes are declining in informal carers<sup>20</sup>, there  
18 is a need to gain further understanding of the underlying mechanisms behind the unique  
19 unmet needs of informal carers of stroke survivors.  
20  
21  
22  
23  
24  
25  
26  
27  
28  
29  
30  
31  
32

33 Unmet needs refer to a need that has not been satisfied yet. Carer needs often relate to  
34 inadequate information and resources, such as receiving information on stroke management  
35 and recovery, and/or how to contact a health care professional who could offer them  
36 psychological or emotional support<sup>21 22</sup>. Research suggests unmet needs result in adverse  
37 outcomes, such as increased burden, and depression and anxiety, for carers of those with  
38 disabilities and chronic illness<sup>19 22-24</sup>. Greenwood et al.<sup>11</sup> systematically reviewed qualitative  
39 studies investigating the challenges, satisfactions and coping strategies of carers of stroke  
40 survivors. The studies in the review described difficulties such as uncertainty,  
41 informational/training needs, and role and relationship changes of carers of stroke survivors.  
42 Unmet needs are an extremely important area of research, and it is becoming increasingly  
43 important to address these unmet needs to ensure the health and wellbeing of carers, and the  
44 people that they care for.  
45  
46  
47  
48  
49  
50  
51  
52  
53  
54  
55  
56  
57  
58  
59  
60



1  
2  
3 While there are interventions designed to address the unmet needs of carers of stroke  
4 survivors, research suggests the interventions require further evaluation, development and  
5 refinement to target these outcomes. A systematic review conducted by Eldred<sup>25</sup> investigating  
6 psychosocial interventions for carers of survivors of stroke found that interventions are  
7 failing to address carer depression, loneliness and stress, while there has been some success  
8 with interventions that use counselling and education to promote coping and adjustment to  
9 the carer role. In these studies, unmet psychological needs (such as depression) were directly  
10 reported by carers using validated measures of psychological health outcomes. These findings  
11 highlight the need to develop effective psychological interventions targeting the psychosocial  
12 functioning of carers of stroke survivors. A systematic review by Aldehaim et al.<sup>26</sup> focused  
13 on technology-based interventions for carers of stroke survivors. Only one study of the five  
14 studies eligible for review assessed carer preparedness for the caring role, a known unmet  
15 need identified by carers of stroke survivors<sup>27-30</sup>. That review emphasized the need for  
16 interventions to be provided to carers of stroke survivors as soon as possible as a strategy to  
17 address unmet needs. The limitations of interventions for carers of stroke survivors include:  
18 (1) not being delivered to carers after the stroke survivor is discharged home; (2) not  
19 providing appropriate interventions to the changing needs of carers through the stroke  
20 survivors' transition from home, to hospital and eventually the community; and (3) not  
21 targeting appropriate unmet needs outcomes for informal carers, including preparedness and  
22 psychosocial functioning, and unique unmet needs for carers of stroke survivors such as  
23 support with possible communication and mobility issues.  
24  
25  
26  
27  
28  
29  
30  
31  
32  
33  
34  
35  
36  
37  
38  
39  
40  
41  
42  
43  
44  
45  
46  
47  
48

49  
50 There are currently no systematic reviews examining the unmet needs of carers of  
51 stroke survivors in both qualitative and quantitative studies. Thus, this review aims to:  
52  
53  
54

- 55 1) Define and identify the unmet needs of carers of stroke survivors
  - 56 2) Define the variables associated with unmet needs of carers of stroke survivors
- 57  
58  
59  
60

- 3) Report the prevalence of unmet needs identified in quantitative studies
- 4) Thematically analyse qualitative data to report meaningful patterns and themes of unmet needs of carers of stroke survivors
- 5) Synthesise quantitative and qualitative research on the unmet needs of carers of stroke survivors to guide the development of interventions and services to support carers of stroke survivors.

## METHODS AND ANALYSES

### Study Design

We will conduct a systematic review of studies reporting on unmet needs of informal carers of stroke survivors. These studies will be published in English and have no publication year limit. Qualitative and quantitative studies will be included and synthesised in this review.

This systematic review protocol will conform with the Preferred Reporting Items for Systematic Review and Meta-Analysis Protocols (PRISMA-P)<sup>31 32</sup> and will be reported in accordance with the (PRISMA) statement<sup>33 34</sup>.

### Study Registration

Based on the PRISMA-P guidelines<sup>31</sup>, this systematic review has been registered with the International Prospective Register of Systematic Reviews (PROSPERO) in July 2017:

CRD42017067391.

### Eligibility criteria

#### Types of studies

To be eligible for this systematic review, manuscripts must be published in a peer-reviewed journal and report primary data on the unmet needs self-reported by carers of stroke survivors. The needs of carers reported by others (such as the stroke survivors or by health

professionals) will be excluded. English language qualitative, quantitative and mixed methods studies will be included. Intervention studies will be included if they report the baseline estimates of carers' unmet needs.

### **Participants**

Carers of stroke survivors are defined as the spouse or partner, family members, friends or 'significant others' who provide unpaid physical, practical or emotional support to someone after their stroke event. Stroke survivors will be defined as an individual who has experienced a stroke event. Studies which report on mixed populations, such as reporting on carers' and stroke survivors' unmet needs, will be included in full text review to investigate if the carers of stroke survivors' data can be extracted separately. Studies will be included if carers provide information related to their unmet needs at any stage of caring for someone following a stroke. Manuscripts that only report on professional carers (doctors, nurses, healthcare providers and others) will be excluded.

### **Measures**

Quantitative and qualitative studies that report any unmet needs of carers of stroke survivors will be included. Quantitative studies may include self-report surveys. Qualitative studies may include interviews and focus groups. We aim to (1) quantify the proportion of carers of stroke survivors reporting unmet needs in various domains and subcategories; (2) categorise carers of stroke survivors' unmet needs by domain; and (3) identify the main variables associated with reporting more unmet needs in carers of stroke survivors.

Unmet needs domains of carers of stroke survivors will be based on Lambert et al<sup>35</sup> which investigated the unmet needs of carers of adult cancer patients. These include unmet needs relating to changes in role and relationship(s), and informational unmet needs, such as preparedness in caring for someone with a chronic illness, and comprehensive knowledge of

1  
2  
3 the condition. As carers of stroke survivors may also have unique needs that differ from being  
4 a carer of cancer survivors, other themes that emerge will also be analysed. These needs may  
5 include managing the loss of mobility<sup>36</sup>, language<sup>37</sup> and mood/personality changes<sup>38</sup> as these  
6 changes are common following a stroke event.  
7  
8  
9

### 10 11 12 **Search Strategy**

13  
14  
15 ‘Stroke’ terms based on a Cochrane Review<sup>39</sup> will be developed. ‘Needs’ and ‘Partners and  
16 Caregivers’ terms will be based on a systematic review of unmet needs of partners and  
17 caregivers diagnosed with cancer<sup>24</sup>. In May 2017, a search strategy was developed on the  
18 MEDLINE database and then adapted for the other databases. This included medical subject  
19 headings (MeSH) and free-text terms using applicable controlled vocabulary. The following  
20 electronic databases will be searched: Medline, PsycINFO, EMBASE, Allied and  
21 Complementary Medicine Database (AMED), Cumulative Index to Nursing and Allied  
22 Health Literature (CINAHL), Scopus and Cochrane Database. Furthermore, the reference  
23 lists of included studies or identified relevant reviews will be searched. There will be no time  
24 limits on publications for the search strategy. Studies will be limited to those conducted  
25 among human subjects and published in English. Reference lists of included studies and  
26 relevant systematic reviews will be searched to identify additional studies for potential  
27 inclusion in this systematic review. The search terms for MEDLINE can be found in  
28 Supplementary Appendix A.  
29  
30  
31  
32  
33  
34  
35  
36  
37  
38  
39  
40  
41  
42  
43  
44  
45  
46

### 47 **Screening the studies**

48  
49 Search results will be entered into Endnote folders, and any duplicates will be removed. The  
50 online tool Covidence<sup>40</sup> will be used by reviewers to produce high-quality evidence for the  
51 systematic review. A flow diagram conforming to PRISMA guidelines<sup>33</sup> will report the  
52 selection process and reasons for exclusion. All titles of retrieved publications will be  
53  
54  
55  
56  
57  
58  
59  
60

1  
2  
3 screened by one reviewer. Two reviewers will independently screen all abstracts, full text and  
4  
5 data extraction. The two will meet to resolve any issues, and if a decision cannot be made, a  
6  
7 third reviewer will be contacted to make the final decision.  
8  
9

### 10 **Data extraction**

11  
12  
13 Data will be extracted by one reviewer, tabled, and checked for accuracy by another  
14  
15 reviewer. The two reviewers will discuss these findings and themes, and if a discrepancy  
16  
17 exists and a consensus cannot be reached, a third reviewer will be contacted to make the final  
18  
19 decision. Data extracted from the quantitative studies will be extracted and analysed. Data  
20  
21 from the qualitative, quantitative and mixed-method studies will be integrated in a systematic  
22  
23 way. Common data extracted from the articles will include: study aims, setting, sample  
24  
25 characteristics, response rates, study methodology, data analysis, primary outcomes and the  
26  
27 unmet needs domains identified. Data extraction tables will be based on Lambert et al.'s  
28  
29 research of the unmet needs of carers of adults with cancer<sup>35</sup>.  
30  
31  
32

### 33 **Quality appraisal**

#### 34 *Qualitative Studies*

35  
36  
37 The methodological quality of qualitative studies will be assessed using the Critical Appraisal  
38  
39 Skills Programme (CASP)<sup>41</sup>. This quality assessment tool was cited by Aziz et al.<sup>9</sup> in the  
40  
41 protocol for a systematic review in understanding stroke survivors' and informal carers'  
42  
43 experiences of and need for primary care and community health services. The CASP tool is a  
44  
45 10-item tool that allows rapid evaluation of the credibility, transferability, dependability and  
46  
47 conformability of the qualitative studies. Two reviewers will assess the methodological  
48  
49 quality of all studies, and if an agreement cannot be reached, a third reviewer will make the  
50  
51 final decision.  
52  
53  
54  
55  
56

#### 57 *Quantitative studies*

1  
2  
3 The methodological quality of quantitative studies will be assessed based on Greenwood et  
4 al<sup>11</sup> who performed a systematic review of the quantitative studies focused on factors  
5 influencing informal carers of stroke survivors. This quality assessment tool assesses six  
6 areas (1) statement of inclusion or exclusion criteria of carers; (2) clear  
7 hypotheses/hypothesis; (3) response rate reported or possible to calculate; (4) multivariate  
8 analysis/possible control for confounders; (5) full definition of carer provided (including  
9 spouse as the definition; and (6) timing of assessment similar for all participants. Studies are  
10 either scored “Yes” with a value of 1, or “No” with a value of 0. Scores are rated on a 6-point  
11 scale: a score of 6 indicates a maximum score, whereas a score 0 indicates a minimum score.  
12  
13  
14  
15  
16  
17  
18  
19  
20  
21  
22

### 23 ***Mixed-method studies***

24  
25  
26 The methodological quality of mixed-method studies will be assessed by using the CASP<sup>41</sup>  
27 on qualitative components, and the methodological assessment developed by Greenwood et  
28 al.<sup>11</sup> where appropriate regarding quantitative components.  
29  
30  
31  
32

### 33 **Data analysis**

#### 34 ***Qualitative studies***

35  
36  
37 Qualitative data will be thematically analysed using the qualitative research software  
38 NVivo<sup>42</sup>. Reviewers will develop descriptive themes through interpretation of the meaningful  
39 patterns in the qualitative research. Codes for unmet needs domains will be assigned to  
40 meaning within the text, and these codes will be compared between studies. Two reviewers  
41 will discuss these meanings, and a third reviewer will be consulted if an agreement cannot be  
42 reached.  
43  
44  
45  
46  
47  
48  
49  
50  
51

#### 52 ***Quantitative studies***

1  
2  
3 The data analysis of quantitative studies in this review will be based on Lambert et al<sup>35</sup>.  
4  
5 Results across quantitative studies will be pooled and the prevalence of unmet needs will be  
6  
7 compiled. Unmet needs domains will be categorised and the factors associated within them  
8  
9 will be examined. Where reported, the average number of unmet needs will be reported. To  
10  
11 facilitate comparison across studies and where appropriate, averages will be standardised  
12  
13 from 0 to 100. Comparable unmet needs will be combined and clustered into domains. Two  
14  
15 reviewers will discuss these outcomes, and a third reviewer will be consulted if a decision  
16  
17 cannot be reached.  
18  
19

### 20 21 *Mixed-method studies*

22  
23  
24 The data of mixed-method studies will be analyzed appropriately. Qualitative components  
25  
26 will be analyzed using NVivo<sup>42</sup>, and quantitative components will be based on the data  
27  
28 analysis reported by Lambert et al<sup>35</sup>.  
29  
30

## 31 **DISCUSSION**

32  
33  
34 Evidence from this systematic review of unmet needs of carers of stroke survivors will  
35  
36 inform the development of interventions and services to address these needs. We will deliver  
37  
38 evidence-based recommendations including consideration of the unmet needs of carers of  
39  
40 stroke survivors in future research, and the refinement and development of interventions and  
41  
42 services for this population. These recommendations may improve carer preparedness for  
43  
44 their new caregiving role, and also assist in supporting carers across all time points of caring  
45  
46 for a person who has survived a stroke. These improvements may subsequently improve the  
47  
48 quality of life of carers by assisting carers to manage their own needs, mental and physical  
49  
50 health, and increase their knowledge in providing physical, emotional and practical care for  
51  
52 the stroke survivor. To our knowledge, this will be the first study to systematically synthesize  
53  
54  
55  
56  
57  
58  
59  
60

1  
2  
3 qualitative and quantitative information regarding the unmet needs of carers of stroke  
4  
5 survivors.  
6

### 7 8 **Strengths and limitations** 9

10  
11 The findings of this systematic review are dependent on the quality of original studies that  
12  
13 will be reviewed. As there are few valid and reliable measures for assessing methodological  
14  
15 rigor of qualitative research <sup>43</sup> and mixed-method assessment <sup>44</sup> there is a risk that flawed  
16  
17 studies may bias the results of the systematic review. To minimise this, reviewers will  
18  
19 independently review studies and communicate effectively if disagreements occur. It is also  
20  
21 possible that there are relevant non-English studies that will not be included in this review.  
22  
23 As such, these findings may not be generalizable to non-English speaking populations, in  
24  
25 which there may be differing cultural unmet needs of carers of stroke survivors.  
26  
27

28  
29 The quality of the review will be strengthened by the input and involvement of  
30  
31 multiple reviewers at each stage of the review. Furthermore, the inclusion of both qualitative  
32  
33 and quantitative studies will provide more informative findings on the unmet needs of carers  
34  
35 of stroke survivors. Our chosen method of analysing and synthesising qualitative and  
36  
37 quantitative data has been tested and found effective for systematic reviews <sup>45</sup>. The findings  
38  
39 of this systematic review will be disseminated publicly and in peer-reviewed journals, and  
40  
41 may be the topic of research presentations.  
42  
43  
44  
45  
46  
47  
48  
49  
50  
51  
52  
53  
54  
55  
56  
57  
58  
59  
60



## Amendments

If the protocol needs to be amended, the date of each amendment, the change and the rationale will be described in this section.

## Contributorship Statement

AMJD is the guarantor of the review. AMJD, ALB, NS, AG, OW, AT, PM and BB assisted in writing the protocol. AMJD performed preliminary data searches, will perform data extraction, conduct quality assessments and draft the systematic review paper. All authors contributed to the design and conception of this review. All authors approved the protocol final manuscript and will offer critical revisions for the review manuscript.

## Funding

This work was supported by a project grant from the National Health and Medical Research Council (NHMRC) of Australia (GNT1045840) and partnership support from the Cancer Council NSW to BB. BB is supported by an Australian National Health and Medical Research Council (NHMRC) Career Development Fellowship (GNT1063206) and a Faculty of Health and Medicine, University of Newcastle Gladys M Brawn Career Development Fellowship. AMJD is supported by a Research Training Program (RTP), University of Newcastle PhD Scholarship. ALB is supported by an Australian NHMRC Senior Research Fellowship and a Faculty of Health and Medicine, University of Newcastle Gladys M Brawn Senior Research Fellowship. NJS is an Australian National Health and Medical Research Council (NHMRC) Career Development / National Heart Foundation (NHF) co-funded Career Development/Future Leader Fellow APPS1110629/ 100827.

## Competing interests

The authors declare that they have no competing interests.

## References

1. National Stroke Foundation. National Stroke Audit – Rehabilitation Services Report Melbourne, Victoria, 2012.
2. Australian Bureau of Statistics. Disability, Ageing and Carers, Australia: Summary of Findings, 2015, 2015.
3. Deloitte Access Economics. The economic impact of stroke in Australia. Barton, Australian Capital Territory, 2013.
4. Carers UK. Valuing carers 2011- calculating the value of carers' support Carers UK, London; 2011., 2011.
5. Carers UK. Facts about caring. Policy briefing 2009., 2009.
6. The National Alliance for Caregiving (NAC) and the AARP Public Policy Institute. Caregiving in the U.S. 2015 Final Report, 2015.
7. Stroke Wise. Caregivers for stroke survivors [Available from: <http://www.strokewise.info/2009/10/caregivers.html>].
8. American Stroke Association. National Family Caregivers.
9. Aziz NA, Pindus DM, Mullis R, et al. Understanding stroke survivors' and informal carers' experiences of and need for primary care and community health services-a systematic review of the qualitative literature: Protocol. *BMJ Open* 2016;6(1) doi: 10.1136/bmjopen-2015-009244
10. Low J, Payne S, Roderick P. The impact of stroke on informal carers: a literature review. *Social Science and Medicine* 1999;49(6):711-25.
11. Greenwood N, Mackenzie A, Cloud GC, et al. Informal carers of stroke survivors–factors influencing carers: a systematic review of quantitative studies. *Disability and rehabilitation* 2008;30(18):1329-49.
12. International Alliance of Carer Organizations. Global Carer Facts 2015 [Available from: [http://www.internationalcarers.org/carer-facts/global-carer-stats/#\\_ednref4](http://www.internationalcarers.org/carer-facts/global-carer-stats/#_ednref4)].
13. Cameron JI, Naglie G, Silver FL, et al. Stroke family caregivers' support needs change across the care continuum: A qualitative study using the timing it right framework. *Disability and Rehabilitation* 2013;35(4):315-24. doi: 10.3109/09638288.2012.691937
14. Lou S, Carstensen K, Jørgensen CR, et al. Stroke patients' and informal carers' experiences with life after stroke: an overview of qualitative systematic reviews. *Disability & Rehabilitation* 2017;39(3):301-13. doi: 10.3109/09638288.2016.1140836
15. Danzl MM, Harrison A, Hunter EG, et al. "A Lot of Things Passed Me by": Rural Stroke Survivors' and Caregivers' Experience of Receiving Education From Health Care Providers. *Journal of Rural Health* 2016;32(1):13-24. doi: 10.1111/jrh.12124
16. Danzl MM, Hunter EG, Campbell S, et al. "Living with a ball and chain": The experience of stroke for individuals and their caregivers in rural appalachian kentucky. *Journal of Rural Health* 2013;29(4):368-82. doi: 10.1111/jrh.12023
17. Han B, Haley WE. Family caregiving for patients with stroke. *Stroke* 1999;30(7):1478-85.
18. Salter K, Zettler L, Foley N, et al. Impact of caring for individuals with stroke on perceived physical health of informal caregivers. *Disability and rehabilitation* 2010;32(4):273-81.
19. Rigby H, Gubitz G, Phillips S. A systematic review of caregiver burden following stroke. *International Journal of Stroke* 2009;4(4):285-92.
20. Australian Institute of Family Studies. The nature and impact of caring for family members with a disability in Australia. Research Report No 16 – June 2008, 2008.

- 1  
2  
3 21. King RB. The Stroke Caregiver Unmet Resource Needs Scale: Development and  
4 Psychometric Testing. *Journal of Neuroscience Nursing* 2015;47(4) doi:  
5 <https://dx.doi.org/10.1097/JNN.0000000000000153>
- 6 22. Bakas T, Austin JK, Okonkwo KF, et al. Needs, concerns, strategies, and advice of stroke  
7 caregivers the first 6 months after discharge. *Journal of Neuroscience Nursing*  
8 2002;34(5):242-51.
- 9 23. Coombs UE. Spousal caregiving for stroke survivors. *Journal of Neuroscience Nursing*  
10 2007;39(2):112-19.
- 11 24. Lambert SD, Harrison JD, Smith E, et al. The unmet needs of partners and caregivers of  
12 adults diagnosed with cancer: a systematic review. *BMJ supportive & palliative care*  
13 2012;bmjspcare-2012-000226.
- 14 25. Eldred C, Sykes C. Psychosocial interventions for carers of survivors of stroke: A  
15 systematic review of interventions based on psychological principles and theoretical  
16 frameworks. *British Journal of Health Psychology* 2008;13(3):563-81. doi:  
17 10.1348/135910707X236899
- 18 26. Aldehaim AY, Alotaibi FF, Uphold CR, et al. The impact of technology-based  
19 interventions on informal caregivers of stroke survivors: A systematic review.  
20 *Telemedicine and e-Health* 2016;22(3):223-31. doi:  
21 <http://dx.doi.org/10.1089/tmj.2015.0062>
- 22 27. Lutz BJ, Young M, Cox KJ, et al. The crisis of stroke: Experiences of patients and their  
23 family caregivers. *Topics in Stroke Rehabilitation* 2011;18(6):786-97. doi:  
24 10.1310/tsr1806-786
- 25 28. Young ME, Lutz BJ, Creasy KR, et al. A comprehensive assessment of family caregivers  
26 of stroke survivors during inpatient rehabilitation. *Disability and Rehabilitation*  
27 2014;36(22):1892-902. doi: 10.3109/09638288.2014.881565
- 28 29. Bakas T, Champion V. Development and psychometric testing of the Bakas Caregiving  
29 Outcomes Scale. *Nursing research* 1999;48(5):250-59.
- 30 30. Brereton L. Preparation for family care giving: stroke as a paradigm case. *Journal of*  
31 *clinical nursing* 1997;6(6):425-34.
- 32 31. Moher D, Shamseer L, Clarke M, et al. Preferred reporting items for systematic review  
33 and meta-analysis protocols (PRISMA-P) 2015 statement. *Systematic reviews*  
34 2015;4(1):1.
- 35 32. Shamseer L, Moher D, Clarke M, et al. Preferred reporting items for systematic review  
36 and meta-analysis protocols (PRISMA-P) 2015: elaboration and explanation. *Bmj*  
37 2015;349:g7647.
- 38 33. Moher D, Liberati A, Tetzlaff J, et al. Preferred reporting items for systematic reviews  
39 and meta-analyses: The prisma statement. *Annals of Internal Medicine*  
40 2009;151(4):264-69. doi: 10.7326/0003-4819-151-4-200908180-00135
- 41 34. Liberati A, Altman DG, Tetzlaff J, et al. The PRISMA statement for reporting systematic  
42 reviews and meta-analyses of studies that evaluate health care interventions:  
43 explanation and elaboration. *PLoS medicine* 2009;6(7):e1000100.
- 44 35. Lambert SD, Harrison JD, Smith E, et al. The unmet needs of partners and caregivers of  
45 adults diagnosed with cancer: a systematic review. *BMJ Supportive & Palliative Care*  
46 2012;2(3):224-30.
- 47 36. Craig LE, Wu O, Bernhardt J, et al. Predictors of poststroke mobility: systematic review.  
48 *International Journal of Stroke* 2011;6(4):321-27. doi: 10.1111/j.1747-  
49 4949.2011.00621.x
- 50 37. Anderson S, Marlett NJ. The language of recovery: How effective communication of  
51 information is crucial to restructuring post-stroke life. *Topics in Stroke Rehabilitation*  
52 2004;11(4):55-67. doi: 10.1310/NPC4-01YV-P66Q-VM9R

- 1  
2  
3 38. Andrewes D, Turner M. Mood and social skills improvement in depressed stroke patients  
4 following interpersonal emotional communication training. *Brain Impairment*  
5 2011;12:67.
- 6 39. Lager KE, Mistri AK, Khunti K, et al. Interventions for improving modifiable risk factor  
7 control in the secondary prevention of stroke. *The Cochrane Library* 2014
- 8 40. Covidence systematic review software. Melbourne, Australia: Veritas Health Innovation;  
9 [Available from: [www.covidence.org](http://www.covidence.org).
- 10 41. Critical Appraisal Skills Programme (CASP). Critical Appraisal Skills Programme  
11 (CASP) Qualitative Research Checklist. Secondary: Critical Appraisal Skills  
12 Programme (CASP) Qualitative Research Checklist., 2013.
- 13 42. QRS International. [Available from: <http://www.qsrinternational.com/>.
- 14 43. Tong A, Flemming K, McInnes E, et al. Enhancing transparency in reporting the  
15 synthesis of qualitative research: ENTREQ. *BMC medical research methodology*  
16 2012;12(1):181.
- 17 44. O'Cathain A, Murphy E, Nicholl J. The quality of mixed methods studies in health  
18 services research. *Journal of Health Services Research & Policy* 2008;13(2)
- 19 45. Twyman L, Bonevski B, Paul C, et al. Perceived barriers to smoking cessation in selected  
20 vulnerable groups: a systematic review of the qualitative and quantitative literature.  
21 *BMJ Open* 2014;4(12):e006414.  
22  
23  
24  
25  
26  
27  
28  
29  
30  
31  
32  
33  
34  
35  
36  
37  
38  
39  
40  
41  
42  
43  
44  
45  
46  
47  
48  
49  
50  
51  
52  
53  
54  
55  
56  
57  
58  
59  
60

## Supplementary Appendix A. MEDLINE Search Strategy

| No. | Search Item                                                                                                                                                         |
|-----|---------------------------------------------------------------------------------------------------------------------------------------------------------------------|
| 1   | (cva\$ or stroke\$ or poststroke\$ or post-stroke\$ or post stroke\$ or transient isch?emic attack\$ or TIA\$ or ministroke\$ or ministroke\$ or mini stroke\$).mp. |
| 2   | (cerebrovascular\$ or cerebral vascular).tw.                                                                                                                        |
| 3   | (cerebral or cerebellar or brain\$ or vertebrobasilar) adj5 (infarct\$ or isch?emi\$ or thrombo\$ or apoplexy or emboli\$).tw                                       |
| 4   | (cerebral or intracerebral or intracranial or brain\$ or cerebellar or subarachnoid) adj5 (accident\$ or h?emorrhag\$).tw                                           |
| 5   | 1 or 2 or 3 or 4                                                                                                                                                    |
| 6   | Need.mp.                                                                                                                                                            |
| 7   | Needs.mp.                                                                                                                                                           |
| 8   | 6 or 7                                                                                                                                                              |
| 9   | Support person.mp.                                                                                                                                                  |
| 10  | Wife.mp.                                                                                                                                                            |
| 11  | Wives.mp.                                                                                                                                                           |
| 12  | Husband*.mp.                                                                                                                                                        |
| 13  | Close relative*.mp.                                                                                                                                                 |
| 14  | Next of kin*.mp.                                                                                                                                                    |
| 15  | Significant other*.mp.                                                                                                                                              |
| 16  | Relative*.mp.                                                                                                                                                       |
| 17  | Caregiver*.mp.                                                                                                                                                      |
| 18  | Carer*.mp.                                                                                                                                                          |
| 19  | Famil*.mp.                                                                                                                                                          |
| 20  | 9 or 10 or 11 or 12 or 13 or 14 or 15 or 16 or 17 or 18 or 19                                                                                                       |
| 21  | 5 and 8 and 20                                                                                                                                                      |
| 22  | limit 21 to (english language and humans)                                                                                                                           |

1  
2  
3  
4  
5  
6  
7  
8  
9  
10  
11  
12  
13  
14  
15  
16  
17  
18  
19  
20  
21  
22  
23  
24  
25  
26  
27  
28  
29  
30  
31  
32  
33  
34  
35  
36  
37  
38  
39  
40  
41  
42  
43  
44  
45  
46  
47  
48  
49

**PRISMA-P (Preferred Reporting Items for Systematic review and Meta-Analysis Protocols) 2015 checklist: recommended items to address in a systematic review protocol\***

| Section and topic                 | Item No | Checklist item                                                                                                                                                                                                                | Page      |
|-----------------------------------|---------|-------------------------------------------------------------------------------------------------------------------------------------------------------------------------------------------------------------------------------|-----------|
| <b>ADMINISTRATIVE INFORMATION</b> |         |                                                                                                                                                                                                                               |           |
| Title:                            |         |                                                                                                                                                                                                                               |           |
| Identification                    | 1a      | Identify the report as a protocol of a systematic review                                                                                                                                                                      | 1         |
| Update                            | 1b      | If the protocol is for an update of a previous systematic review, identify as such                                                                                                                                            |           |
| Registration                      | 2       | If registered, provide the name of the registry (such as PROSPERO) and registration number                                                                                                                                    | 9         |
| Authors:                          |         |                                                                                                                                                                                                                               |           |
| Contact                           | 3a      | Provide name, institutional affiliation, e-mail address of all protocol authors; provide physical mailing address of corresponding author                                                                                     | 1-3       |
| Contributions                     | 3b      | Describe contributions of protocol authors and identify the guarantor of the review                                                                                                                                           | 16        |
| Amendments                        | 4       | If the protocol represents an amendment of a previously completed or published protocol, identify as such and list changes; otherwise, state plan for documenting important protocol amendments                               | 16        |
| Support:                          |         |                                                                                                                                                                                                                               |           |
| Sources                           | 5a      | Indicate sources of financial or other support for the review                                                                                                                                                                 | 16        |
| Sponsor                           | 5b      | Provide name for the review funder and/or sponsor                                                                                                                                                                             | 16        |
| Role of sponsor or funder         | 5c      | Describe roles of funder(s), sponsor(s), and/or institution(s), if any, in developing the protocol                                                                                                                            |           |
| <b>INTRODUCTION</b>               |         |                                                                                                                                                                                                                               |           |
| Rationale                         | 6       | Describe the rationale for the review in the context of what is already known                                                                                                                                                 | 6-8       |
| Objectives                        | 7       | Provide an explicit statement of the question(s) the review will address with reference to participants, interventions, comparators, and outcomes (PICO)                                                                      | 8-9       |
| <b>METHODS</b>                    |         |                                                                                                                                                                                                                               |           |
| Eligibility criteria              | 8       | Specify the study characteristics (such as PICO, study design, setting, time frame) and report characteristics (such as years considered, language, publication status) to be used as criteria for eligibility for the review | 9-11      |
| Information sources               | 9       | Describe all intended information sources (such as electronic databases, contact with study authors, trial registers or other grey literature sources) with planned dates of coverage                                         | 11        |
| Search strategy                   | 10      | Present draft of search strategy to be used for at least one electronic database, including planned limits,                                                                                                                   | 11 and 20 |

|                                    |     |                                                                                                                                                                                                                                                  |       |
|------------------------------------|-----|--------------------------------------------------------------------------------------------------------------------------------------------------------------------------------------------------------------------------------------------------|-------|
|                                    |     | such that it could be repeated                                                                                                                                                                                                                   |       |
| Study records:                     |     |                                                                                                                                                                                                                                                  |       |
| Data management                    | 11a | Describe the mechanism(s) that will be used to manage records and data throughout the review                                                                                                                                                     | 11-14 |
| Selection process                  | 11b | State the process that will be used for selecting studies (such as two independent reviewers) through each phase of the review (that is, screening, eligibility and inclusion in meta-analysis)                                                  | 11-14 |
| Data collection process            | 11c | Describe planned method of extracting data from reports (such as piloting forms, done independently, in duplicate), any processes for obtaining and confirming data from investigators                                                           | 12    |
| Data items                         | 12  | List and define all variables for which data will be sought (such as PICO items, funding sources), any pre-planned data assumptions and simplifications                                                                                          |       |
| Outcomes and prioritization        | 13  | List and define all outcomes for which data will be sought, including prioritization of main and additional outcomes, with rationale                                                                                                             | 10-11 |
| Risk of bias in individual studies | 14  | Describe anticipated methods for assessing risk of bias of individual studies, including whether this will be done at the outcome or study level, or both; state how this information will be used in data synthesis                             | 12-14 |
| Data synthesis                     | 15a | Describe criteria under which study data will be quantitatively synthesised                                                                                                                                                                      | 12-14 |
|                                    | 15b | If data are appropriate for quantitative synthesis, describe planned summary measures, methods of handling data and methods of combining data from studies, including any planned exploration of consistency (such as $I^2$ , Kendall's $\tau$ ) |       |
|                                    | 15c | Describe any proposed additional analyses (such as sensitivity or subgroup analyses, meta-regression)                                                                                                                                            |       |
|                                    | 15d | If quantitative synthesis is not appropriate, describe the type of summary planned                                                                                                                                                               | 15    |
| Meta-bias(es)                      | 16  | Specify any planned assessment of meta-bias(es) (such as publication bias across studies, selective reporting within studies)                                                                                                                    |       |
| Confidence in cumulative evidence  | 17  | Describe how the strength of the body of evidence will be assessed (such as GRADE)                                                                                                                                                               | 12-14 |

**\* It is strongly recommended that this checklist be read in conjunction with the PRISMA-P Explanation and Elaboration (cite when available) for important clarification on the items. Amendments to a review protocol should be tracked and dated. The copyright for PRISMA-P (including checklist) is held by the PRISMA-P Group and is distributed under a Creative Commons Attribution Licence 4.0.**

*From: Shamseer L, Moher D, Clarke M, Ghersi D, Liberati A, Petticrew M, Shekelle P, Stewart L, PRISMA-P Group. Preferred reporting items for systematic review and meta-analysis protocols (PRISMA-P) 2015: elaboration and explanation. BMJ. 2015 Jan 2;349(jan02 1):g7647.*
